# Supplementary material for: Ancient DNA from Chalcolithic Israel reveals the role of population mixture in cultural transformation
Source: PubMed Central journal article supplement (PMC6102297; doi:10.1038/s41467-018-05649-9), 2018-08-20
Supplement: 41467_2018_5649_MOESM3_ESM.pdf [file 41467_2018_5649_MOESM3_ESM.pdf]

## Description of Additional Supplementary Files

**File Name:** Supplementary Data 1

**Description:** Library Information for All Samples Processed

**File Name:** Supplementary Data 2

**Description:** Modeling Levant\_ChL as descended from a single source population

**File Name:** Supplementary Data 3

**Description:** Modeling Levant\_ChL as descended from a mixture of two source populations

**File Name:** Supplementary Data 4

**Description:** Modeling Levant\_ChL as descended from a mixture of three source populations

**File Name:** Supplementary Data 5

**Description:** Statistics of the form  $f_4(\text{Levant\_BA\_North}, \text{Levant\_BA\_South}; A, \text{Chimp})$  test for cladedness between previously published Bronze Age groups from the Levant.

**File Name:** Supplementary Data 6

**Description:** Modeling Levant\_BA\_South and Levant\_BA\_North as descended from a mixture of two source populations

**File Name:** Supplementary Data 7

**Description:** Allele Frequencies

**File Name:** Supplementary Data 8

**Description:** Population Admixture into East Africa
